# Supplementary material for: Effects of Water Deficit Stress on Growth Parameters of Robinia pseudoacacia L. Selected Clones under In Vitro Conditions
Source: MDPI journal article supplement (doi:10.3390/f13121979), 2022-11-23
Supplement: s1 [file s1]

## Supplementary

**Table S1.** Total shoot length means TSL (cm) of 10PT clone of *R.pseudoacacia* in different osmotic treatments measured after 0, 2, 4, 6, and 8 weeks of drought stress exposition (effect of Clone  $\times$  Osmoticum  $\times$  Time). Different treatments are denoted: “control” – medium without osmoticum, “S30” – medium with 30 gL<sup>-1</sup> of sucrose, “S60” – medium with 60 gL<sup>-1</sup> of sucrose, “S90”- medium with 900 gL<sup>-1</sup> of sucrose, “M25”- medium with 25 gL<sup>-1</sup> of mannitol, “M90” medium with 90 gL<sup>-1</sup> of mannitol, “M120” medium with 120 gL<sup>-1</sup> of mannitol

| Osmoticum      | Time (weeks) |   |   |            |    |   |           |   |   |           |    |   |            |   |   |
|----------------|--------------|---|---|------------|----|---|-----------|---|---|-----------|----|---|------------|---|---|
|                | Mean±SE      |   |   |            |    |   |           |   |   |           |    |   |            |   |   |
|                | 0            |   |   | 2          |    |   | 4         |   |   | 6         |    |   | 8          |   |   |
| control        | 2.39±0.08    | a | A | 2.84±0.08  | c  | B | 3.03±0.08 | b | C | 3.14±0.08 | bc | D | 3.28±0.09  | c | E |
| S30            | 2.29±0.08    | a | A | 2.79±0.08  | c  | B | 2.94±0.08 | b | C | 3.20±0.08 | c  | D | 3.36±0.09  | c | E |
| M25            | 2.45±0.08    | a | A | 2.52±0.08  | a  | A | 2.53±0.09 | a | B | 2.54±0.09 | a  | B | 2.54±0.09  | a | B |
| S60            | 2.43±0.08    | a | A | 2.71±0.08  | bc | B | 2.87±0.08 | b | C | 2.94±0.08 | b  | D | 3.023±0.09 | b | E |
| S90            | 2.30±0.09    | a | A | 2.47±0.09  | ab | B | 2.56±0.09 | a | C | 2.64±0.10 | a  | D | 2.70±0.10  | a | D |
| M90            | 2.35±0.08    | a | A | 2.44±0.08  | a  | A | 2.52±0.08 | a | A | 2.53±0.09 | a  | A | 2.53±0.09  | a | A |
| M120           | 2.39±0.09    | a | A | 2.40±0.10  | a  | A | 2.43±0.10 | a | A | 2.46±0.10 | a  | A | 2.48±0.11  | a | A |
| Total for time | 2.37±0.03    |   | A | 2.560±0.03 |    | A | 2.70±0.03 |   | A | 2.78±0.03 |    | A | 2.84±0.04  |   | A |

Means with the same lowercase letter within a column or means with the same uppercase letter within a row are not significantly different at  $p \leq 0.05$ ; SE – standard error

**Table S2.** Total shoot length means TSL (cm) of 4SO clone of *R.pseudoacacia* in different osmotic treatments measured after 0, 2, 4, 6, and 8 weeks of drought stress exposition (effect of Clone  $\times$  Osmoticum  $\times$  Time). Different treatments are denoted: “control” – medium without osmoticum, “S30” – medium with 30 gL<sup>-1</sup> of sucrose, “S60” – medium with 60 gL<sup>-1</sup> of sucrose, “S90”- medium with 900 gL<sup>-1</sup> of sucrose, “M25”- medium with 25 gL<sup>-1</sup> of mannitol, “M90” medium with 90 gL<sup>-1</sup> of mannitol, “M120” medium with 120 gL<sup>-1</sup> of mannitol

| Osmoticum | Time (weeks) |    |   |           |    |   |           |    |   |           |    |   |           |   |   |
|-----------|--------------|----|---|-----------|----|---|-----------|----|---|-----------|----|---|-----------|---|---|
|           | Mean±SE      |    |   |           |    |   |           |    |   |           |    |   |           |   |   |
|           | 0            |    |   | 2         |    |   | 4         |    |   | 6         |    |   | 8         |   |   |
| control   | 2.03±0.09    | b  | A | 2.45±0.09 | d  | B | 2.58±0.09 | c  | C | 2.62±0.09 | d  | C | 2.66±0.1  | c | C |
| S30       | 1.85±0.09    | ab | A | 2.46±0.09 | d  | B | 2.66±0.09 | c  | C | 2.88±0.09 | e  | D | 3.15±0.1  | d | E |
| M25       | 1.80±0.10    | a  | A | 1.93±0.10 | ab | B | 2.02±0.10 | ab | C | 2.02±0.11 | ab | C | 2.03±0.11 | a | C |

|                       |           |    |   |            |    |   |           |    |   |           |    |   |           |   |   |
|-----------------------|-----------|----|---|------------|----|---|-----------|----|---|-----------|----|---|-----------|---|---|
| <b>S60</b>            | 1.73±0.08 | a  | A | 2.12±0.08  | bc | B | 2.23±0.08 | b  | C | 2.33±0.08 | c  | D | 2.44±0.09 | b | E |
| <b>S90</b>            | 1.80±0.18 | ab | A | 1.93±0.18  | ab | A | 2.00±0.18 | ab | A | 2.05±0.19 | ab | A | 2.08±0.20 | a | A |
| <b>M90</b>            | 1.70±0.12 | a  | A | 1.74±0.12  | a  | A | 1.80±0.13 | a  | A | 1.80±0.13 | a  | A | 1.84±0.13 | a | A |
| <b>M120</b>           | 2.13±0.12 | b  | A | 2.21±0.12  | cd | A | 2.29±0.12 | b  | A | 2.29±0.12 | bc | A | 2.37±0.13 | b | A |
| <b>Total for time</b> | 1.86±0.04 |    | A | 2.121±0.04 |    | A | 2.23±0.04 |    | A | 2.28±0.05 |    | A | 2.37±0.05 |   | A |

Means with the same lowercase letter within a column or means with the same uppercase letter within a row are

not significantly different at  $p \leq 0.05$ ; SE – standard error

**Table S3.** Total shoot length means TSL (cm) of 6SO clone of *R.pseudoacacia* in different osmotic treatments measured after 0, 2, 4, 6, and 8 weeks of drought stress exposition (effect of Clone  $\times$  Osmoticum  $\times$  Time). Different treatments are denoted: “control” – medium without osmoticum, “S30” – medium with 30 gL<sup>-1</sup> of sucrose, “S60” – medium with 60 gL<sup>-1</sup> of sucrose, “S90”- medium with 90 gL<sup>-1</sup> of sucrose, “M25”- medium with 25 gL<sup>-1</sup> of mannitol, “M90” medium with 90 gL<sup>-1</sup> of mannitol, “M120” medium with 120 gL<sup>-1</sup> of mannitol

| Osmoticum      | Time (weeks) |   |   |           |    |   |           |    |    |           |    |    |           |    |   |
|----------------|--------------|---|---|-----------|----|---|-----------|----|----|-----------|----|----|-----------|----|---|
|                | Mean±SE      |   |   |           |    |   |           |    |    |           |    |    |           |    |   |
|                | 0            |   | 2 |           | 4  |   | 6         |    | 8  |           |    |    |           |    |   |
| control        | 1.72±0.08    | a | A | 2.23±0.08 | bc | B | 2.29±0.08 | ab | B  | 2.32±0.09 | ab | B  | 2.33±0.09 | ab | B |
| S30            | 2.40±0.08    | c | A | 2.68±0.08 | de | B | 2.94±0.08 | c  | C  | 3.11±0.08 | c  | D  | 3.24±0.09 | d  | E |
| M25            | 1.83±0.08    | a | A | 1.94±0.08 | a  | B | 2.22±0.08 | a  | C  | 2.26±0.08 | a  | C  | 2.29±0.09 | a  | C |
| S60            | 2.24±0.08    | c | A | 2.41±0.08 | cd | B | 2.48±0.08 | b  | BC | 2.53±0.08 | b  | CD | 2.59±0.09 | c  | D |
| S90            | 2.36±0.08    | c | A | 2.50±0.08 | d  | B | 2.52±0.08 | b  | B  | 2.54±0.08 | b  | B  | 2.56±0.09 | bc | B |
| M90            | 1.96±0.08    | b | A | 2.05±0.08 | ab | A | 2.09±0.09 | a  | A  | 2.24±0.09 | a  | B  | 2.26±0.09 | a  | B |
| M120           | 1.93±0.10    | a | A | 2.10±0.10 | ab | B | 2.15±0.10 | a  | B  | 2.18±0.11 | a  | B  | 2.22±0.11 | a  | B |
| Total for time | 2.06±0.03    |   | A | 2.27±0.03 |    | A | 2.38±0.03 |    | A  | 2.45±0.03 |    | A  | 2.50±0.04 |    | A |

Means with the same lowercase letter within a column or means with the same uppercase letter within a row are

not significantly different at  $p \leq 0.05$ ; SE – standard error

**Table S4.** Fresh weight (FW) (g) of *R. pseudoacacia* clone (10PT) for different treatments measured after 0, 2, 4, 6, and 8 weeks of drought stress exposition. Different treatments are denoted: “control” – medium without osmoticum, “S30” – medium with 30 gL<sup>-1</sup> of sucrose, “S60” - medium with 60 gL<sup>-1</sup> of sucrose, “S90”- medium with 90 gL<sup>-1</sup> of sucrose, “M25”- medium with 25 gL<sup>-1</sup> of mannitol, “M90” medium with 90 gL<sup>-1</sup> of mannitol, “M120” medium with 120 gL<sup>-1</sup> of mannitol. Effect of Clone × Osmoticum × Time

| Osmoticum             | Time (weeks) |     |           |      |           |     |           |      |           |     |  |  |
|-----------------------|--------------|-----|-----------|------|-----------|-----|-----------|------|-----------|-----|--|--|
|                       | Mean±SE      |     |           |      |           |     |           |      |           |     |  |  |
|                       | 0            |     | 2         |      | 4         |     | 6         |      | 8         |     |  |  |
| <b>control</b>        | 0.04±0.02    | a A | 0.07±0.02 | b B  | 0.10±0.02 | a C | 0.12±0.02 | b D  | 0.15±0.02 | b E |  |  |
| <b>S30</b>            | 0.04±0.02    | a A | 0.11±0.02 | b B  | 0.21±0.02 | b C | 0.32±0.02 | c D  | 0.43±0.02 | c E |  |  |
| <b>M25</b>            | 0.03±0.02    | a A | 0.04±0.02 | a A  | 0.06±0.02 | a A | 0.07±0.02 | ab A | 0.08±0.02 | a A |  |  |
| <b>S60</b>            | 0.03±0.02    | a A | 0.08±0.02 | b B  | 0.20±0.02 | b C | 0.29±0.02 | c D  | 0.40±0.02 | c E |  |  |
| <b>S90</b>            | 0.04±0.02    | a A | 0.08±0.02 | b B  | 0.20±0.02 | b C | 0.27±0.02 | c D  | 0.41±0.02 | c E |  |  |
| <b>M90</b>            | 0.03±0.02    | a A | 0.04±0.02 | a A  | 0.04±0.02 | a A | 0.05±0.02 | a A  | 0.05±0.02 | a A |  |  |
| <b>M120</b>           | 0.04±0.03    | a A | 0.05±0.03 | ab A | 0.06±0.03 | a A | 0.07±0.03 | ab A | 0.07±0.03 | a A |  |  |
| <b>Total for time</b> | 0.04±0.01    | A   | 0.07±0.01 | B    | 0.12±0.01 | C   | 0.17±0.01 | D    | 0.23±0.01 | E   |  |  |

Means with the same lowercase letter within a column or means with the same uppercase letter within a row are not significantly different at  $p \leq 0.05$ ; SE – standard error

**Table S5.** Fresh weight (FW) (g) of *R. pseudoacacia* clone (4SO) for different treatments measured after 0, 2, 4, 6, and 8 weeks of drought stress exposition. Different treatments are denoted: “control” – medium without osmoticum, “S30” – medium with 30 gL<sup>-1</sup> of sucrose, “S60” - medium with 60 gL<sup>-1</sup> of sucrose, “S90”- medium with 90 gL<sup>-1</sup> of sucrose, “M25”- medium with 25 gL<sup>-1</sup> of mannitol, “M90” medium with 90 gL<sup>-1</sup> of mannitol, “M120” medium with 120 gL<sup>-1</sup> of mannitol. Effect of Clone × Osmoticum × Time

| Osmoticum      | Time (weeks) |     |           |     |           |     |           |     |           |     |  |  |
|----------------|--------------|-----|-----------|-----|-----------|-----|-----------|-----|-----------|-----|--|--|
|                | Mean±SE      |     |           |     |           |     |           |     |           |     |  |  |
|                | 0            |     | 2         |     | 4         |     | 6         |     | 8         |     |  |  |
| <b>control</b> | 0.03±0.02    | a A | 0.07±0.02 | a B | 0.08±0.02 | a B | 0.12±0.02 | a C | 0.14±0.02 | a D |  |  |
| <b>S30</b>     | 0.02±0.02    | a A | 0.08±0.02 | a B | 0.24±0.02 | b C | 0.49±0.02 | c D | 0.67±0.02 | c E |  |  |
| <b>M25</b>     | 0.02±0.03    | a A | 0.06±0.03 | a B | 0.08±0.03 | a B | 0.09±0.03 | a B | 0.09±0.03 | a B |  |  |
| <b>S60</b>     | 0.03±0.02    | a A | 0.09±0.02 | a B | 0.21±0.02 | b C | 0.27±0.02 | b D | 0.37±0.02 | b E |  |  |
| <b>S90</b>     | 0.02±0.05    | a A | 0.05±0.05 | a A | 0.09±0.05 | a A | 0.12±0.05 | a A | 0.15±0.05 | a A |  |  |

|                       |           |   |   |           |   |   |           |   |   |           |   |   |           |   |   |
|-----------------------|-----------|---|---|-----------|---|---|-----------|---|---|-----------|---|---|-----------|---|---|
| <b>M90</b>            | 0.03±0.03 | a | A | 0.05±0.03 | a | A | 0.09±0.03 | a | B | 0.10±0.03 | a | B | 0.10±0.03 | a | B |
| <b>M120</b>           | 0.04±0.03 | a | A | 0.07±0.03 | a | A | 0.08±0.03 | a | A | 0.09±0.03 | a | A | 0.10±0.03 | a | A |
| <b>Total for time</b> | 0.03±0.01 |   | A | 0.07±0.01 |   | B | 0.12±0.01 |   | C | 0.18±0.01 |   | D | 0.23±0.01 |   | E |

Means with the same lowercase letter within a column or means with the same uppercase letter within a row are not significantly different at  $p \leq 0.05$ ; SE – standard error

**Table S6.** Fresh weight (FW) (g) of *R. pseudoacacia* clone (6SO) for different treatments measured after 0, 2, 4, 6, and 8 weeks of drought stress exposition. Different treatments are denoted: “control” – medium without osmoticum, “S30” – medium with 30 gL<sup>-1</sup> of sucrose, “S60” - medium with 60 gL<sup>-1</sup> of sucrose, “S90”- medium with 90 gL<sup>-1</sup> of sucrose, “M25”- medium with 25 gL<sup>-1</sup> of mannitol, “M90” medium with 90 gL<sup>-1</sup> of mannitol, “M120” medium with 120 gL<sup>-1</sup> of mannitol. Effect of Clone × Osmoticum × Time

| Osmoticum      | Time (weeks) |   |   |           |    |   |           |   |   |           |   |   |           |    |   |
|----------------|--------------|---|---|-----------|----|---|-----------|---|---|-----------|---|---|-----------|----|---|
|                | Mean±SE      |   |   |           |    |   |           |   |   |           |   |   |           |    |   |
|                | 0            |   | 2 |           | 4  |   | 6         |   | 8 |           |   |   |           |    |   |
| control        | 0.02±0.02    | a | A | 0.04±0.02 | b  | B | 0.07±0.02 | a | C | 0.09±0.02 | a | C | 0.11±0.02 | b  | D |
| S 30           | 0.02±0.02    | a | A | 0.10±0.02 | b  | B | 0.33±0.02 | c | C | 0.59±0.02 | d | D | 0.80±0.02 | e  | E |
| M 25           | 0.02±0.02    | a | A | 0.04±0.02 | ab | A | 0.05±0.02 | a | A | 0.07±0.02 | a | A | 0.07±0.02 | ab | A |
| S 60           | 0.02±0.02    | a | A | 0.08±0.02 | b  | B | 0.29±0.02 | c | C | 0.38±0.02 | c | D | 0.47±0.02 | d  | E |
| S 90           | 0.03±0.02    | a | A | 0.09±0.02 | b  | B | 0.19±0.02 | b | C | 0.29±0.02 | b | D | 0.41±0.02 | c  | E |
| M 90           | 0.02±0.02    | a | A | 0.03±0.02 | a  | A | 0.04±0.02 | a | A | 0.04±0.02 | a | A | 0.04±0.02 | a  | A |
| M 120          | 0.03±0.03    | a | A | 0.03±0.03 | a  | A | 0.04±0.03 | a | A | 0.04±0.03 | a | A | 0.05±0.03 | ab | A |
| Total for time | 0.02±0.01    |   | A | 0.06±0.01 |    | B | 0.14±0.01 |   | C | 0.21±0.01 |   | D | 0.28±0.01 |    | E |

Means with the same lowercase letter within a column or means with the same uppercase letter within a row are not significantly different at  $p \leq 0.05$ ; SE – standard error
